# Supplementary material for: Photoluminescence properties and preferable site occupancy of Ce3+in apatite-like RbSr4(BO3)3blue-emitting phosphors for white LEDs
Source: Royal Society of Chemistry journal article supplement (doi:10.1039/c7nj02178j), 2017-01-01

## Supporting Information

Photoluminescence properties and preferable site occupancy of  $\text{Ce}^{3+}$  in apatite-like  $\text{RbSr}_4(\text{BO}_3)_3$  blue-emitting phosphor for white LED

*Zhen Jia,<sup>a,b</sup> Mingjun Xia<sup>a\*</sup>*

<sup>a</sup> Key Laboratory of Coordination Chemistry and Functional Materials in Universities of Shandong, Department of Chemistry, Dezhou University, Dezhou, 253023, P. R. China.

<sup>b</sup> Beijing Center for Crystal Research and Development, Key Laboratory of Functional Crystals and Laser Technology, Technical Institute of Physics and Chemistry, Chinese Academy of Sciences, Beijing, 100190, P. R. China,

\*Corresponding author: Dr. Mingjun Xia

Email: [xiamingjun@mail.ipc.ac.cn](mailto:xiamingjun@mail.ipc.ac.cn)

Figure S1. Photoluminescence excitation and emission spectra for RSBO:0.06Ce<sup>3+</sup> sample and BAM:Eu<sup>2+</sup> phosphor.

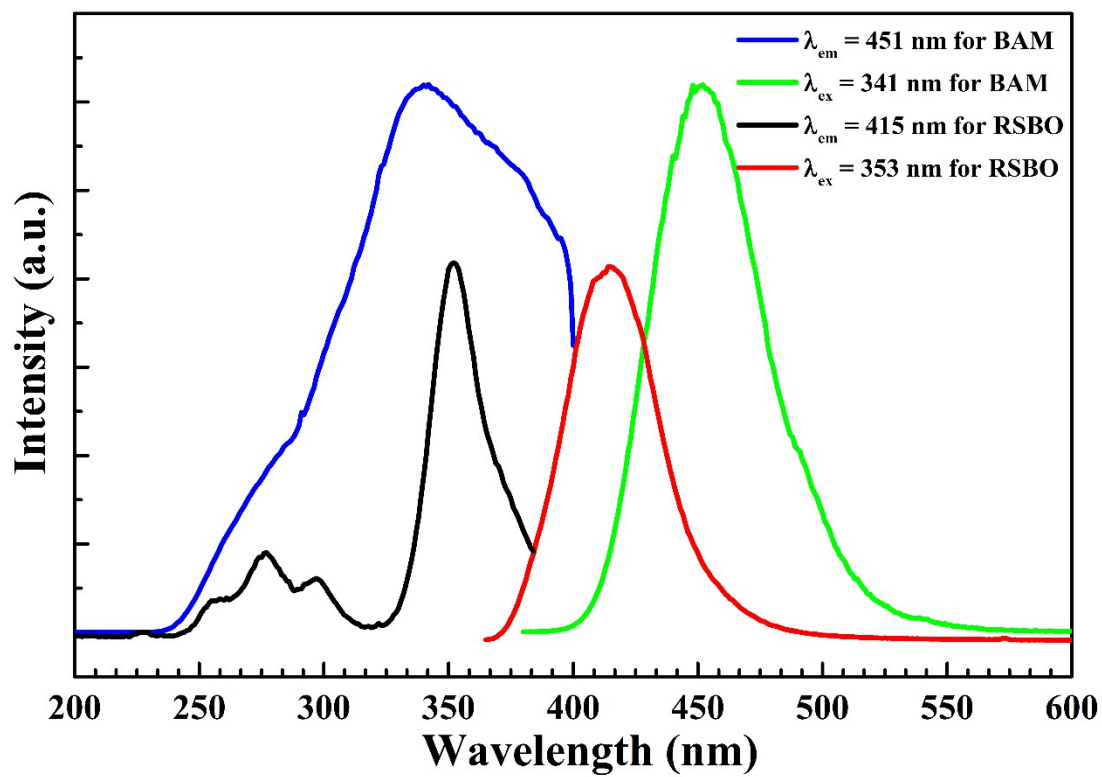

Supplement: c7nj02178j1.pdf [file c7nj02178j1.pdf]
